# Supplementary material for: TINAGL1 and B3GALNT1 are potential therapy target genes to suppress metastasis in non-small cell lung cancer
Source: PubMed Central journal article supplement (PMC4290609; doi:10.1186/1471-2164-15-s9-s2), 2014-12-08

mRNA: NM\_152739

cor= 5.545e-02

P= 9.445e-01

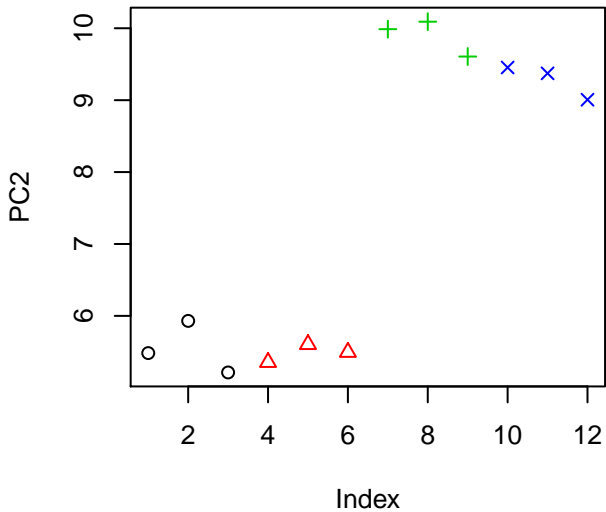

methyl

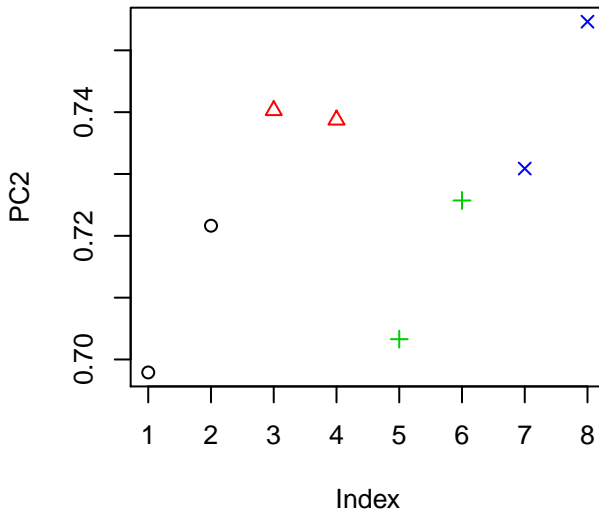

mRNA: NM\_005523

cor= -4.078e-01

P= 5.922e-01

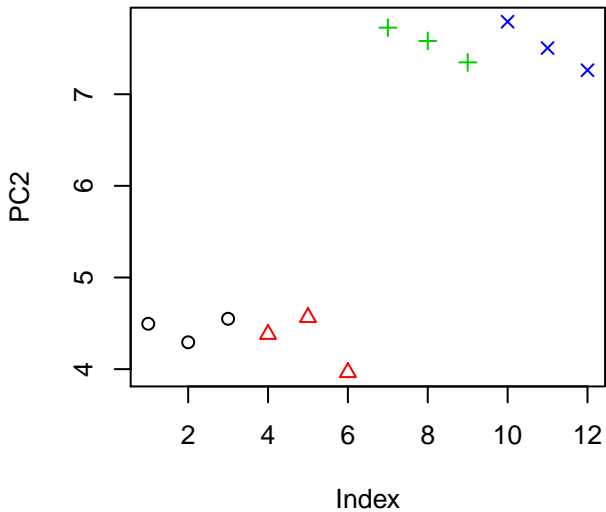

methyl

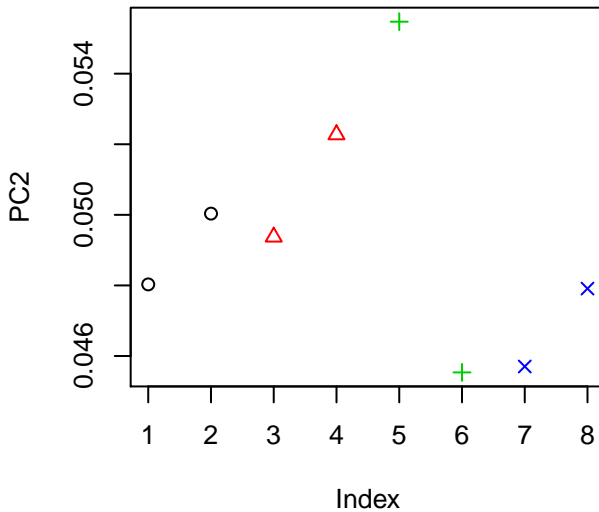

mRNA: NM\_000439

cor=  $-5.592e-01$

P=  $4.408e-01$

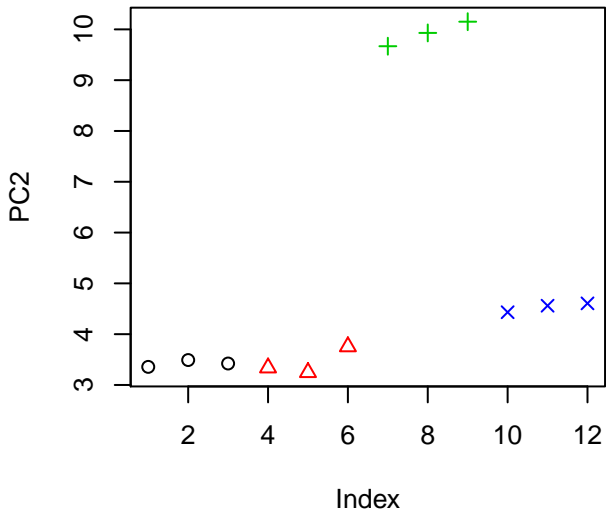

methyl

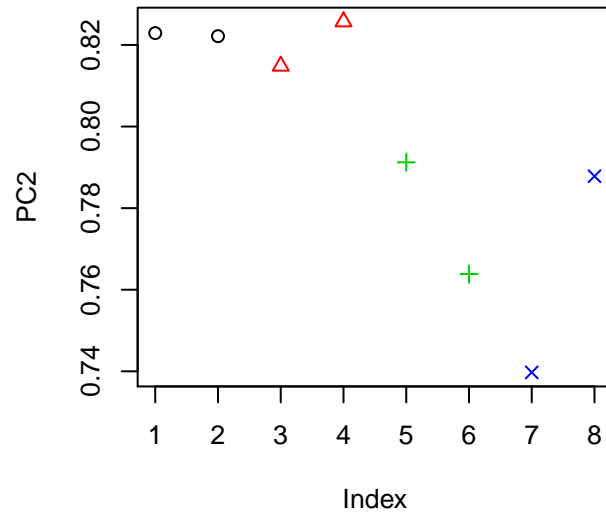

mRNA: NM\_003118

cor=  $-6.694e-01$

P=  $3.306e-01$

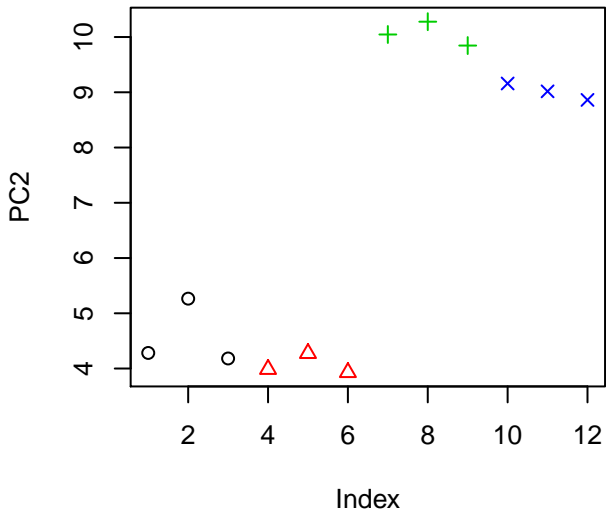

methyl

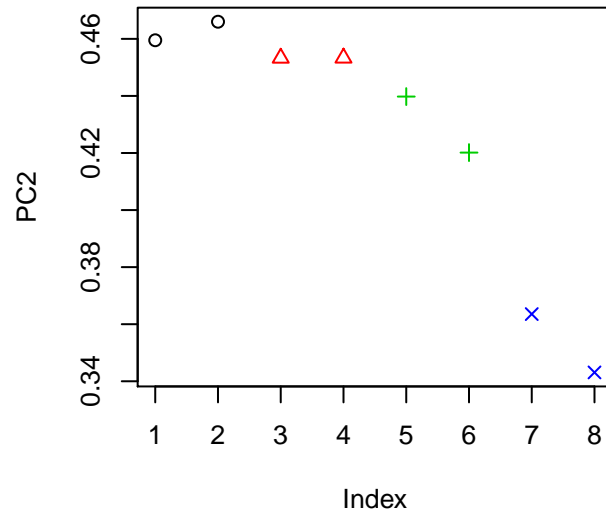

mRNA: NM\_021977

cor=  $-8.453e-01$

P=  $1.547e-01$

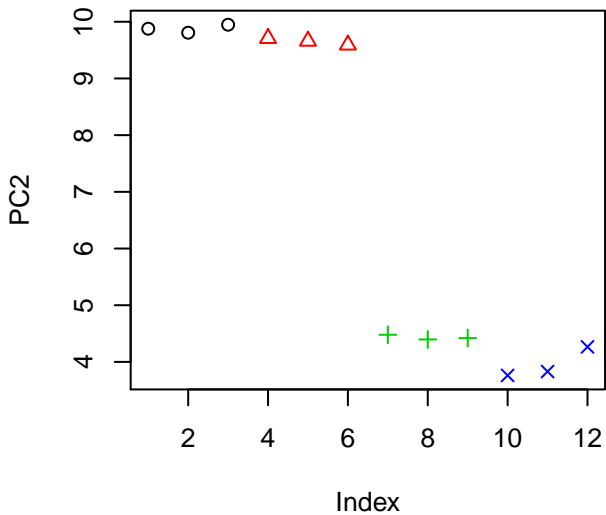

methyl

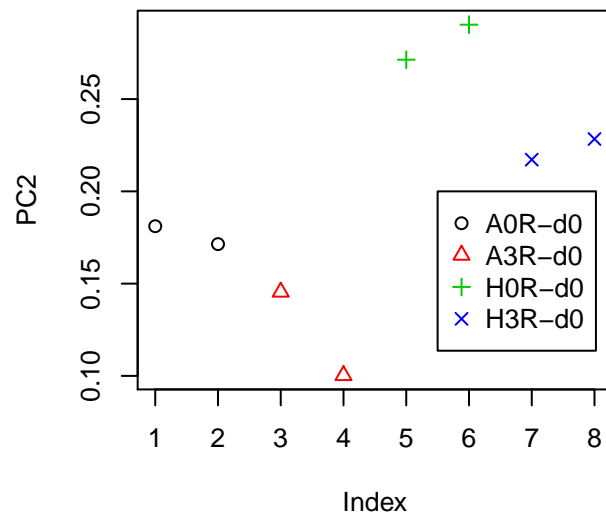

mRNA: NM\_004403

cor=  $4.207e-01$

P=  $5.793e-01$

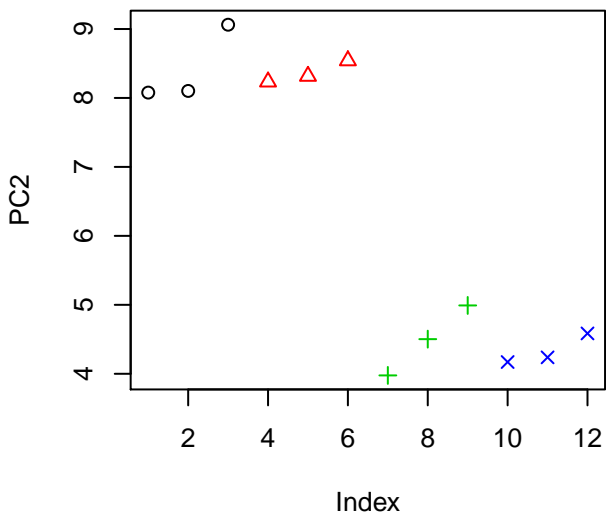

methyl

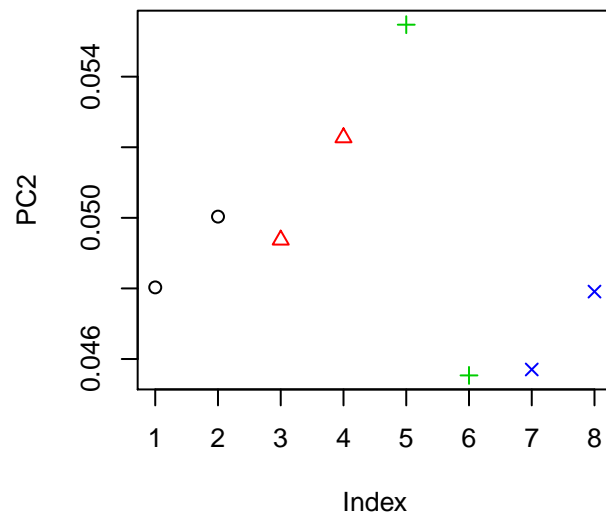

mRNA: NM\_015087

cor=  $-4.903e-01$

P=  $5.097e-01$

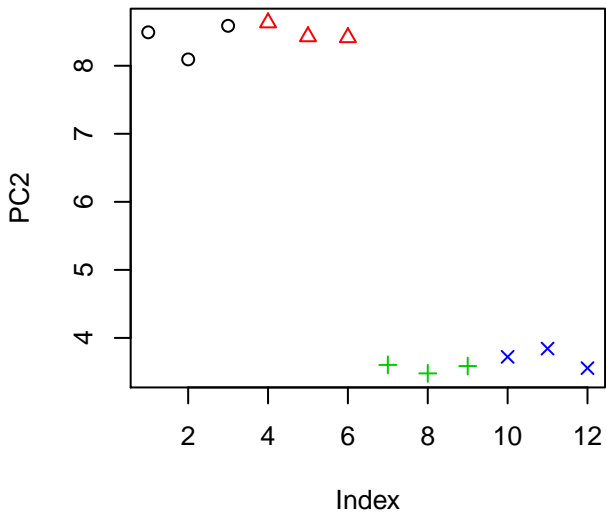

methyl

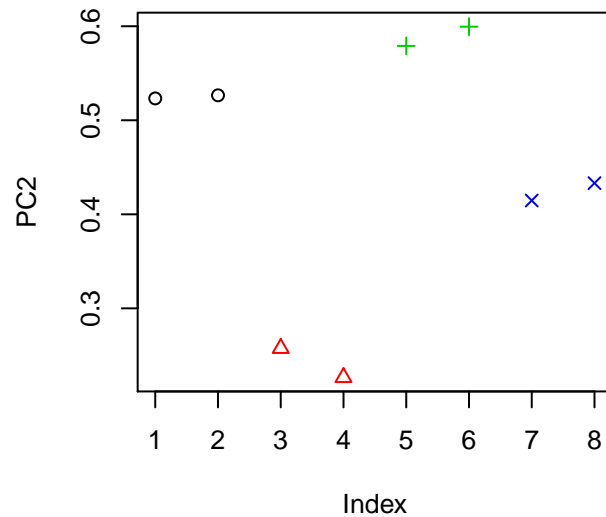

mRNA: NM\_000104

cor=  $-9.210e-01$

P=  $7.904e-02$

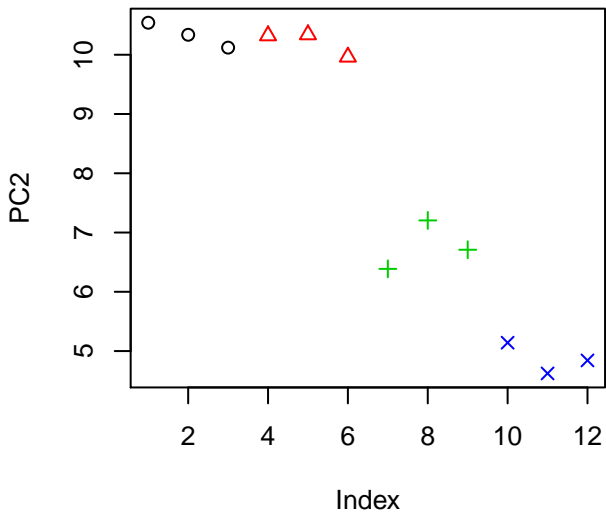

methyl

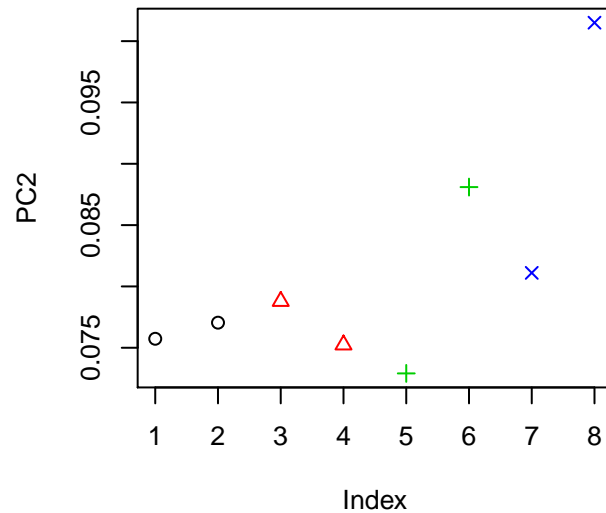

mRNA: NM\_006982

cor= 3.778e-01

P= 6.222e-01

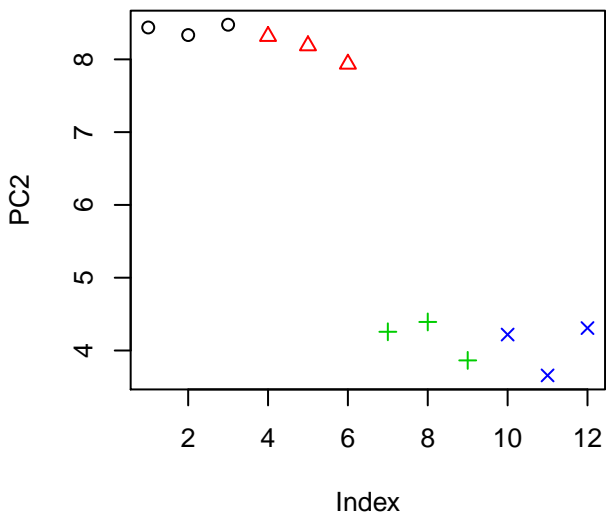

methyl

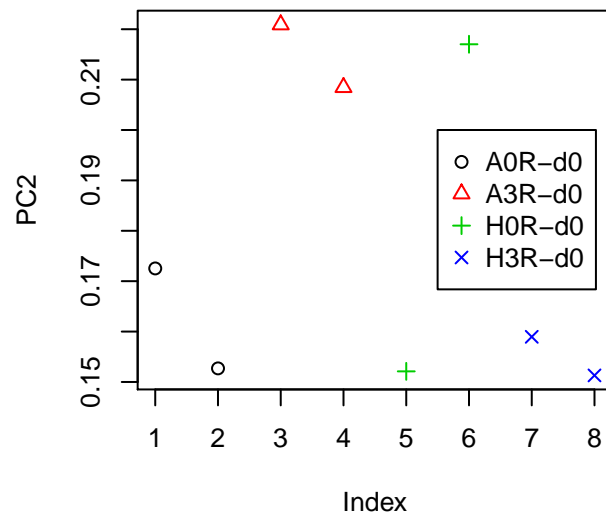

mRNA: NM\_006528

cor= 4.841e-01

P= 5.159e-01

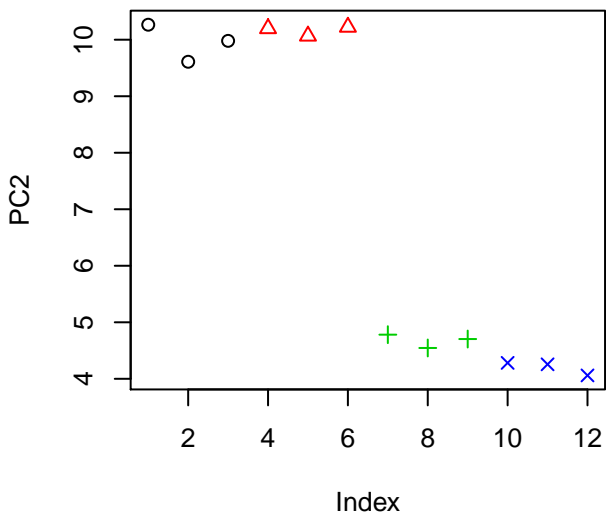

methyl

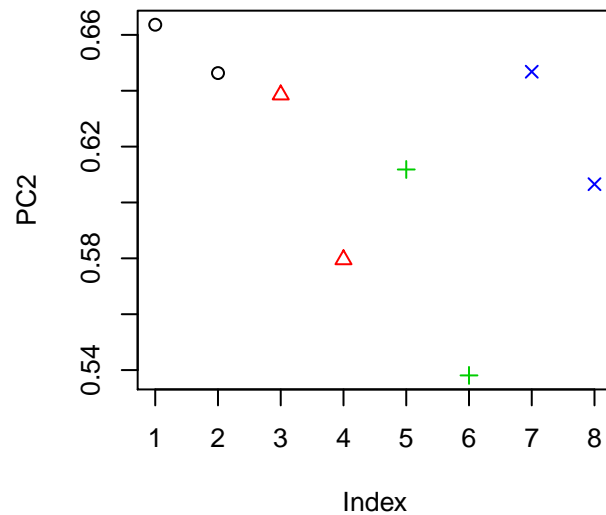

Supplement: 1471-2164-15-S9-S2-S1.pdf [file 1471-2164-15-S9-S2-S1.pdf]
