# Supplementary material for: TINAGL1 and B3GALNT1 are potential therapy target genes to suppress metastasis in non-small cell lung cancer
Source: PubMed Central journal article supplement (PMC4290609; doi:10.1186/1471-2164-15-s9-s2), 2014-12-08

mRNA: NM\_002145

cor=  $-4.029e-01$

P=  $5.971e-01$

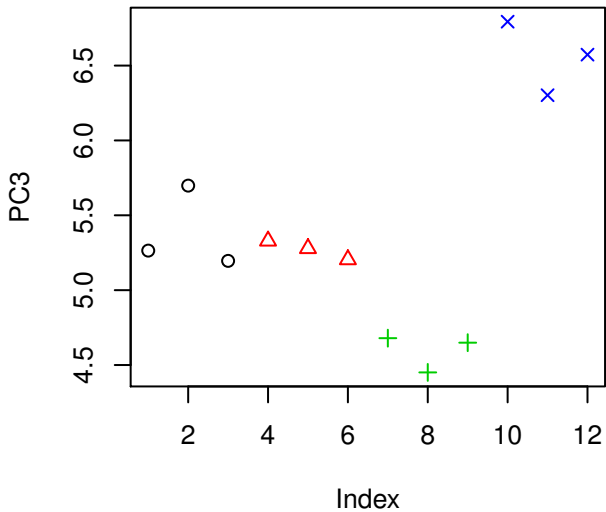

methyl

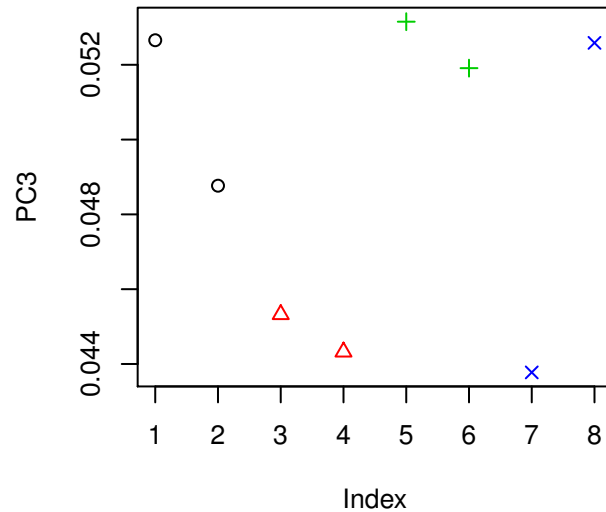

mRNA: NM\_032040

cor=  $4.308e-01$

P=  $5.692e-01$

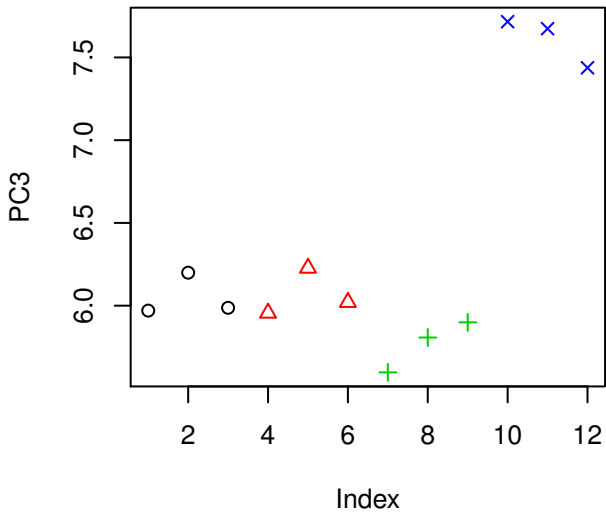

methyl

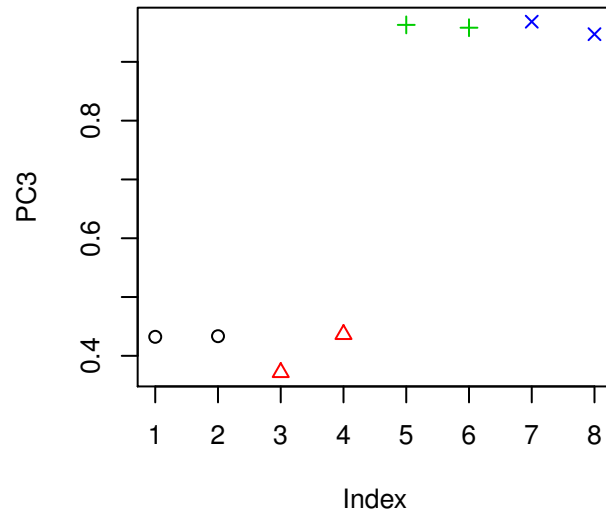

mRNA: NM\_153608

cor= 7.367e-01

P= 2.633e-01

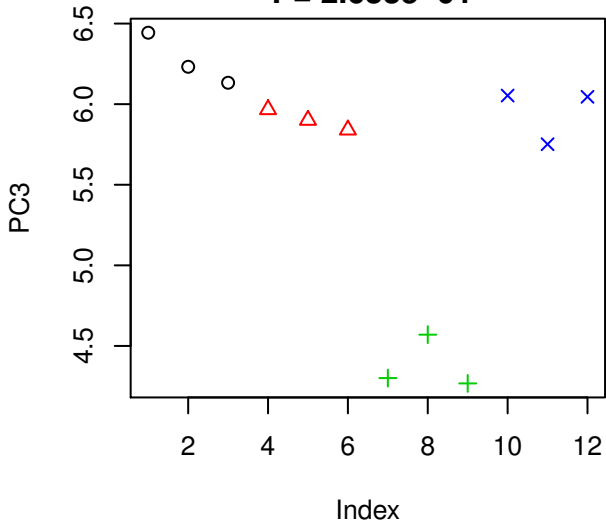

methyl

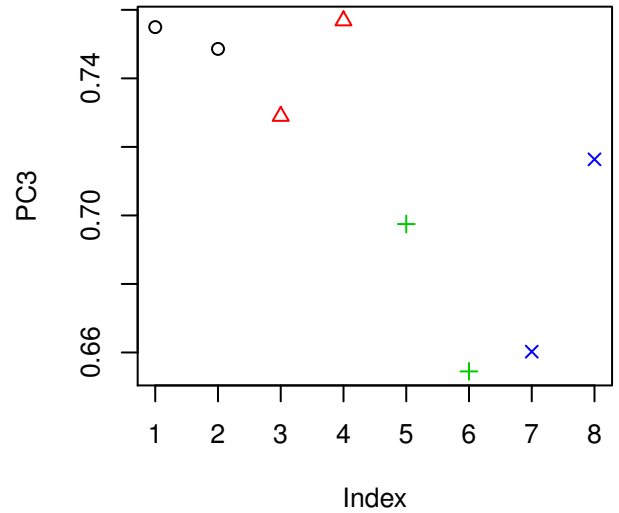

mRNA: NM\_000793

cor= 2.983e-01

P= 7.017e-01

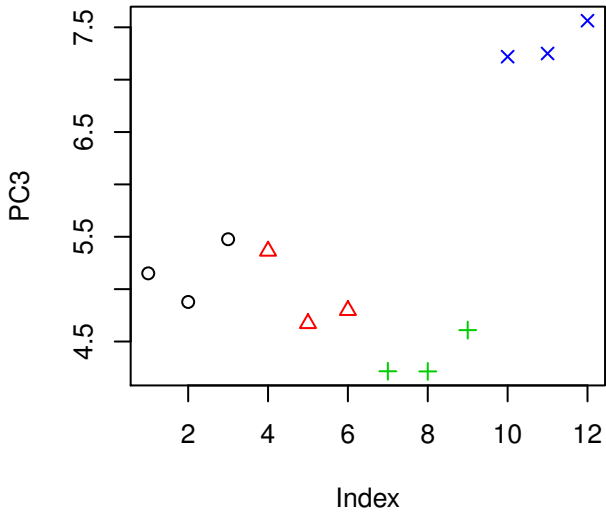

methyl

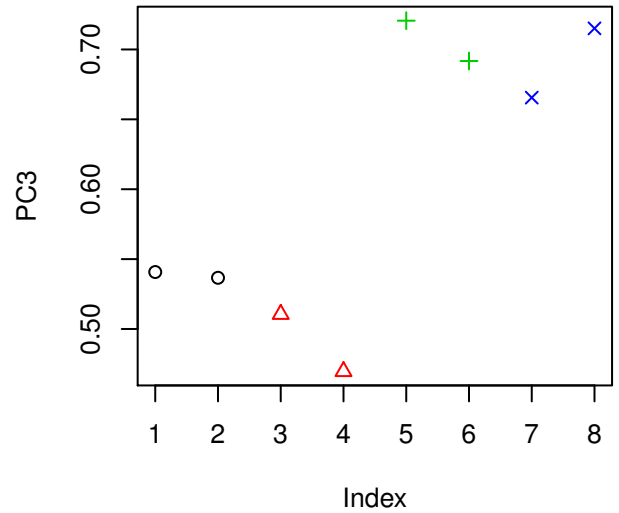

mRNA: NM\_006762

cor=  $-9.951e-01$

P=  $4.907e-03$

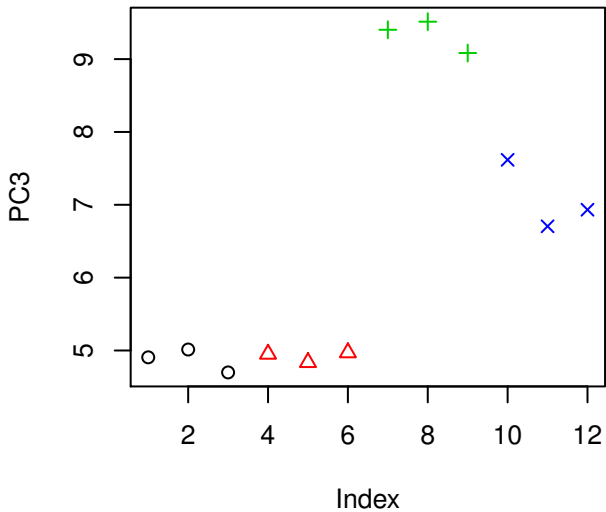

methyl

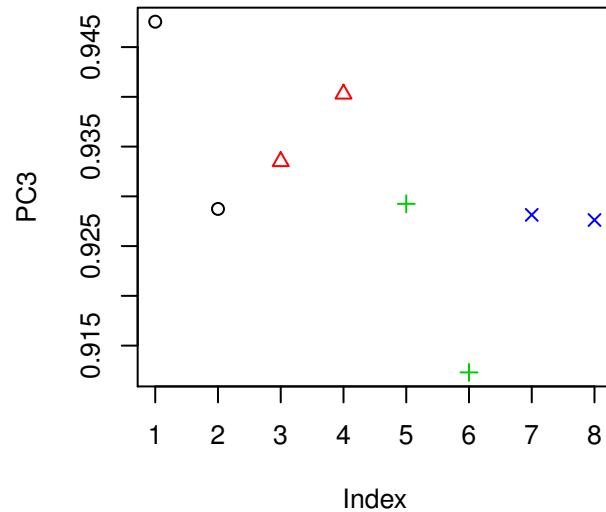

mRNA: NM\_002922

cor=  $6.664e-01$

P=  $3.336e-01$

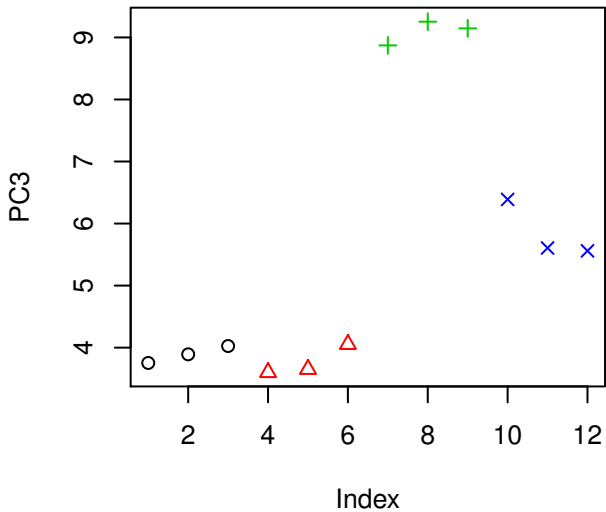

methyl

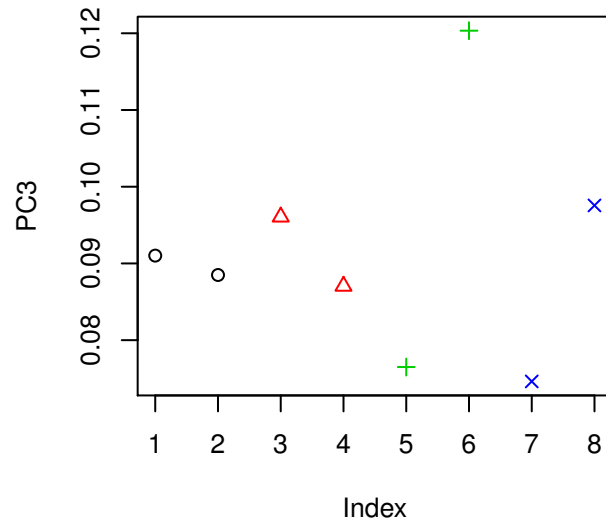

mRNA: NM\_003781

cor= 2.400e-01

P= 7.600e-01

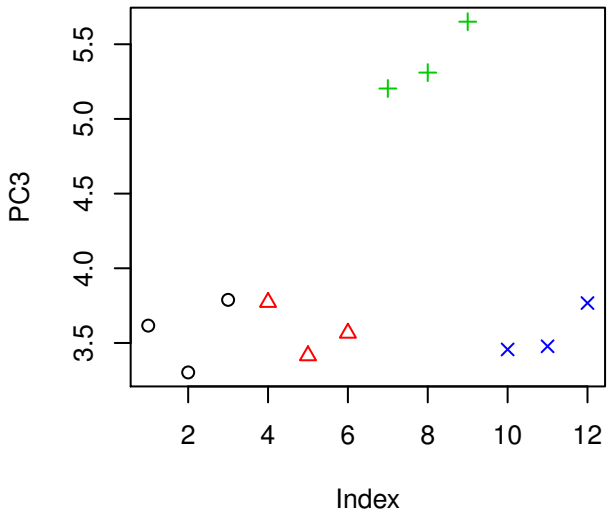

methyl

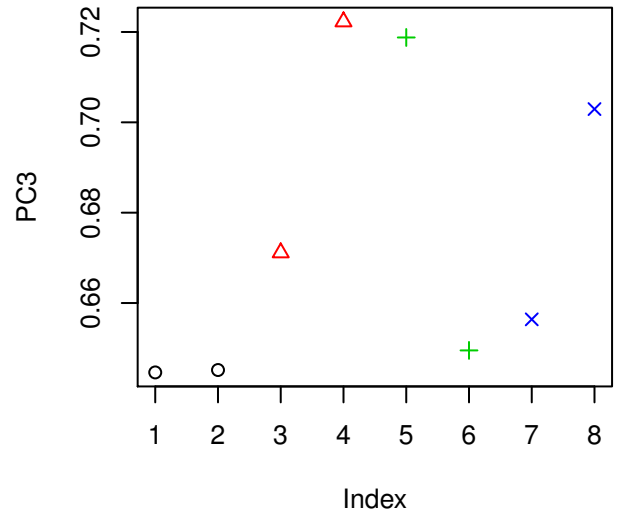

Supplement: 1471-2164-15-S9-S2-S2.pdf [file 1471-2164-15-S9-S2-S2.pdf]
