# Supplementary material for: TINAGL1 and B3GALNT1 are potential therapy target genes to suppress metastasis in non-small cell lung cancer
Source: PubMed Central journal article supplement (PMC4290609; doi:10.1186/1471-2164-15-s9-s2), 2014-12-08

1GMV\_hld, Cyscore = -1.8086

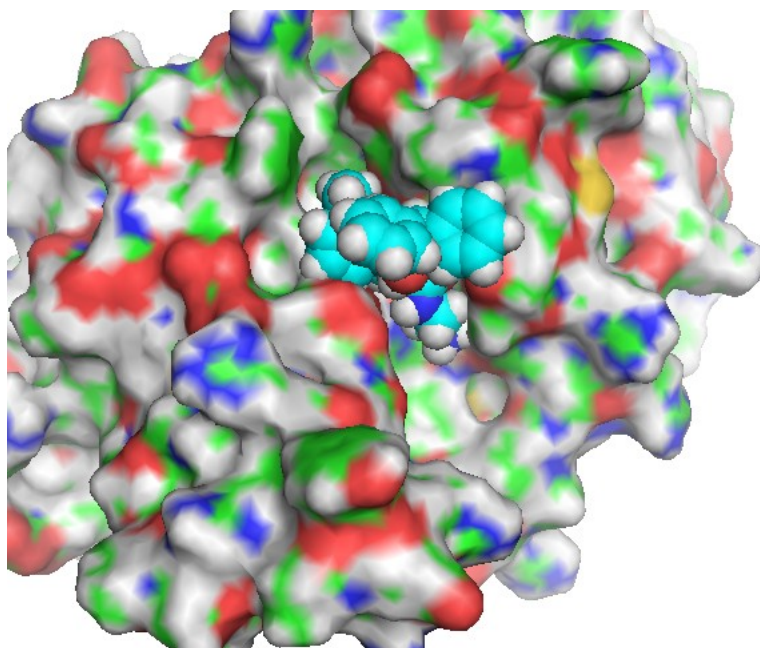

1ITO\_E6C, Cyscore = -0.4461

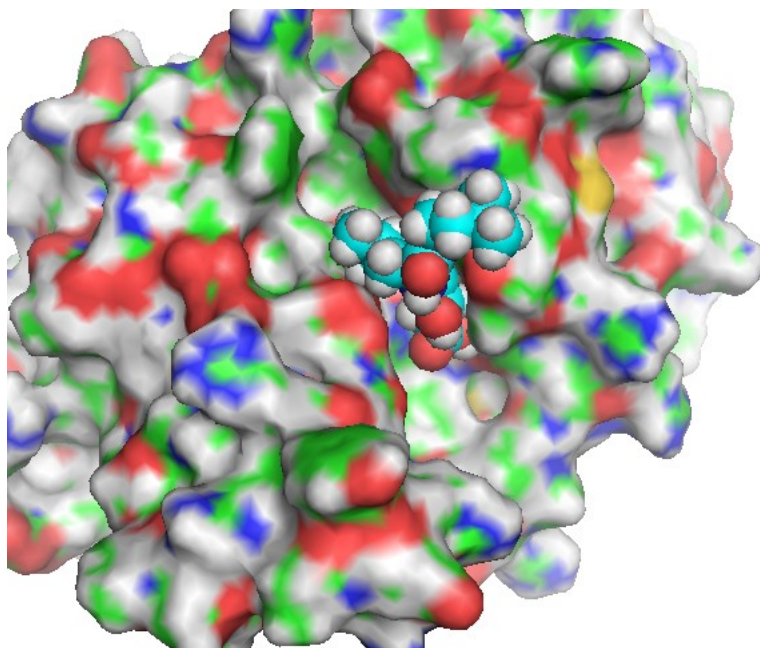

1QDQ\_074, Cyscore=-2.8243

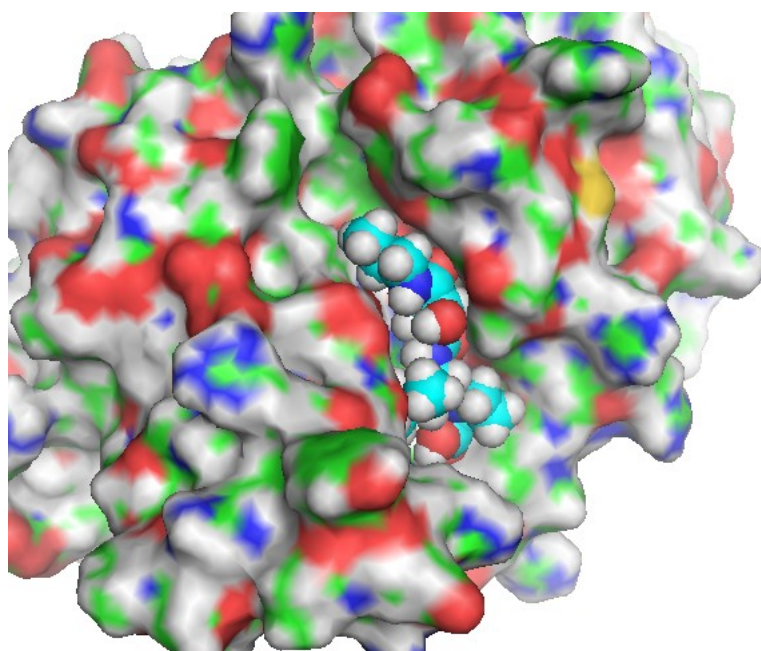

2DC6\_73V, Cyscore= -1.7081

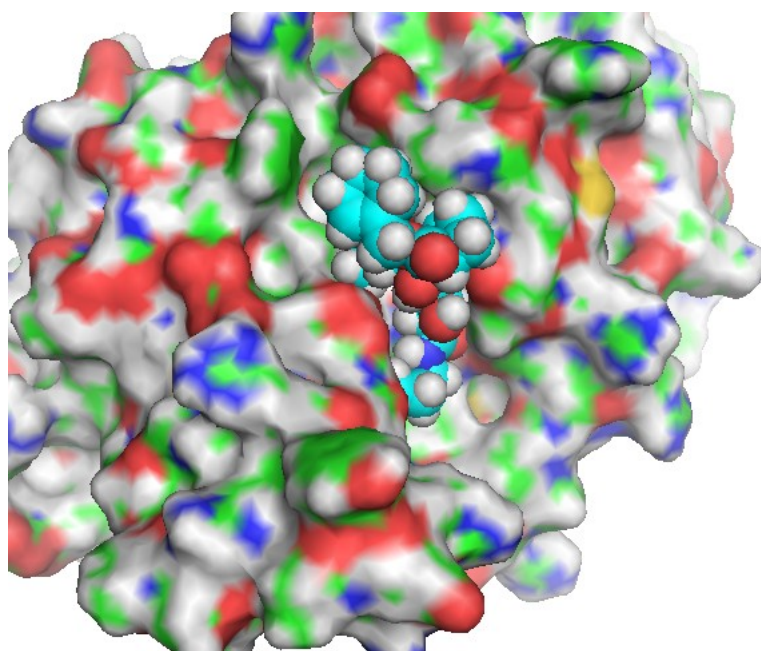

2DC7\_042, Cyscore= -1.514

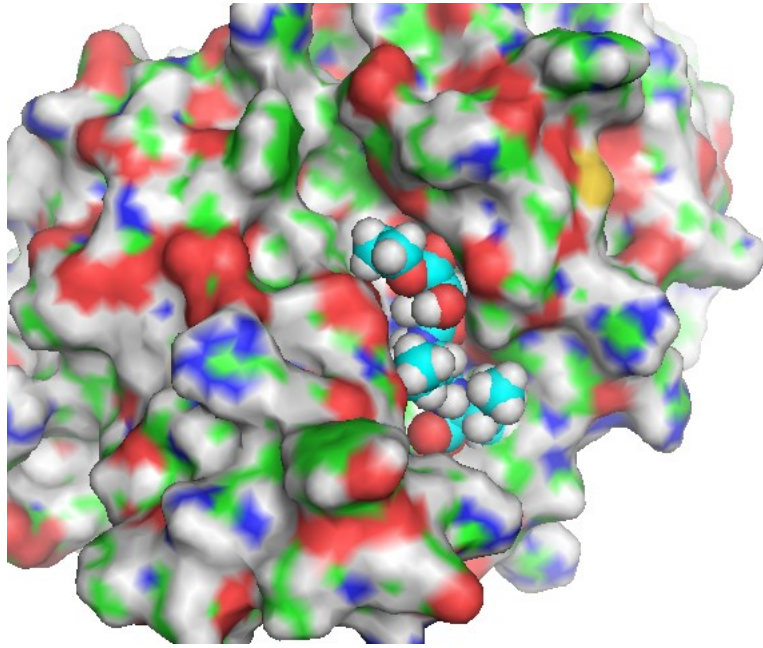

2DC8\_59A, Cyscore=-1.717

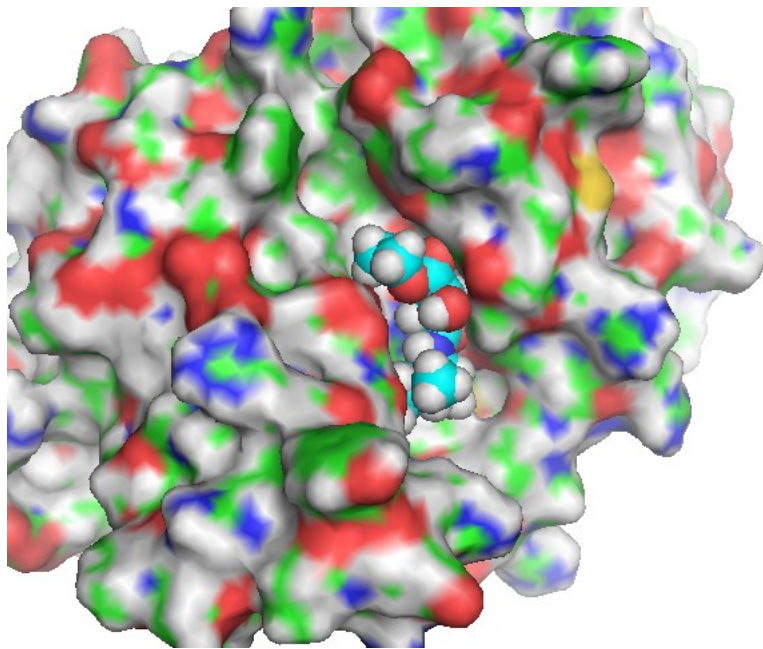

2DC9\_74M, Cyscore=-2.1026

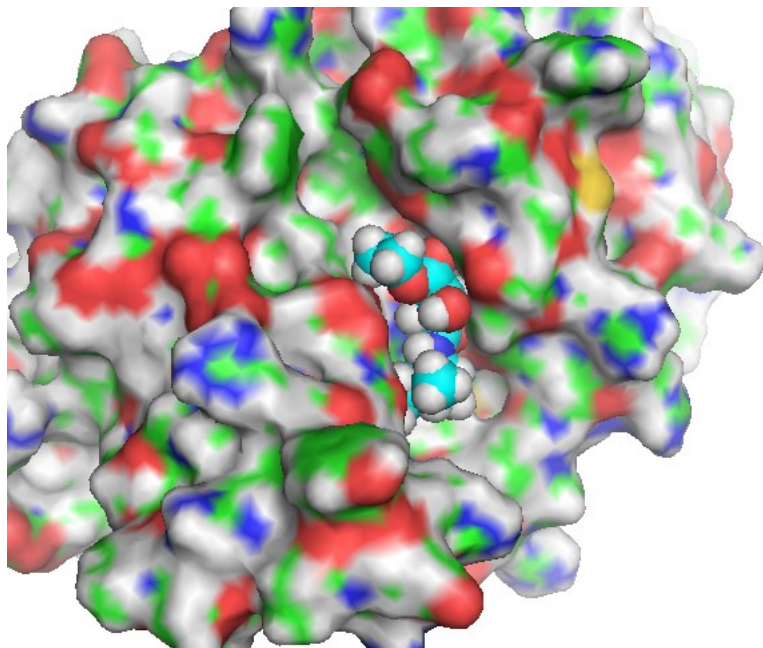

2DCA\_75V, Cyscore=-2.1103

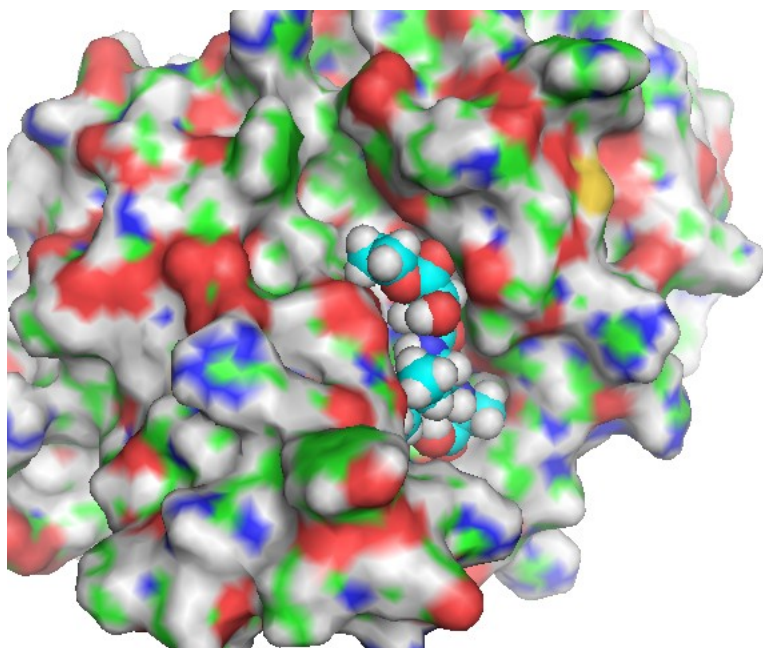

2DCB\_76V, Cyscore=-2.7419

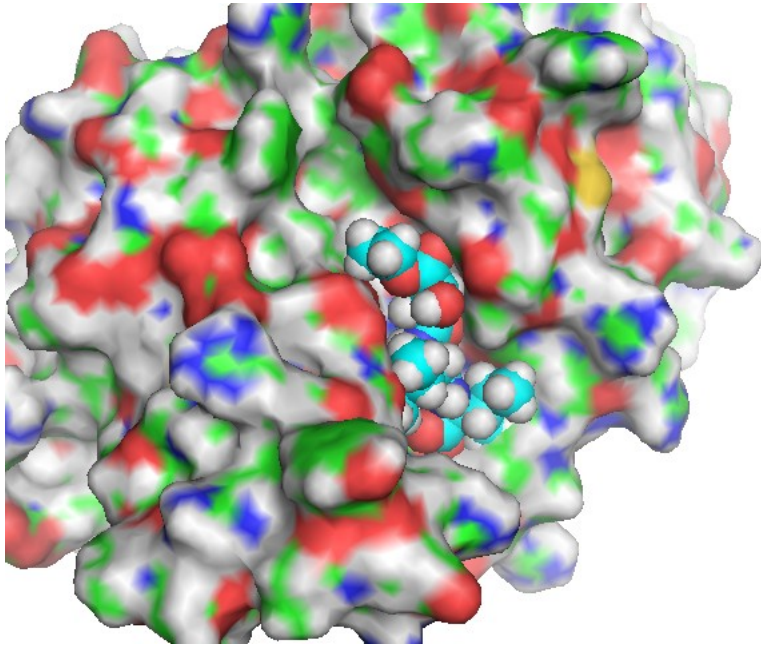

2DCC\_77B, Cyscore= -2.0373

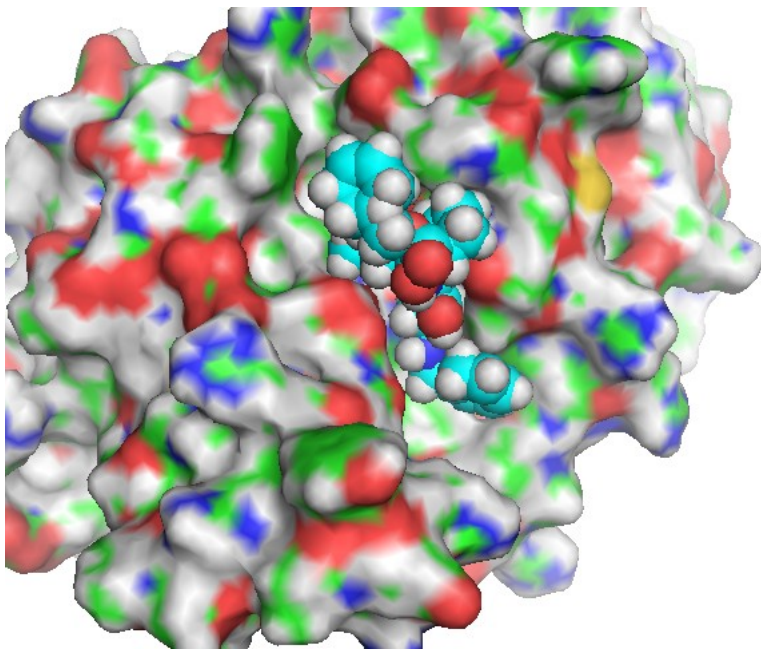

2DCD\_78A, Cyscore=-2.7627

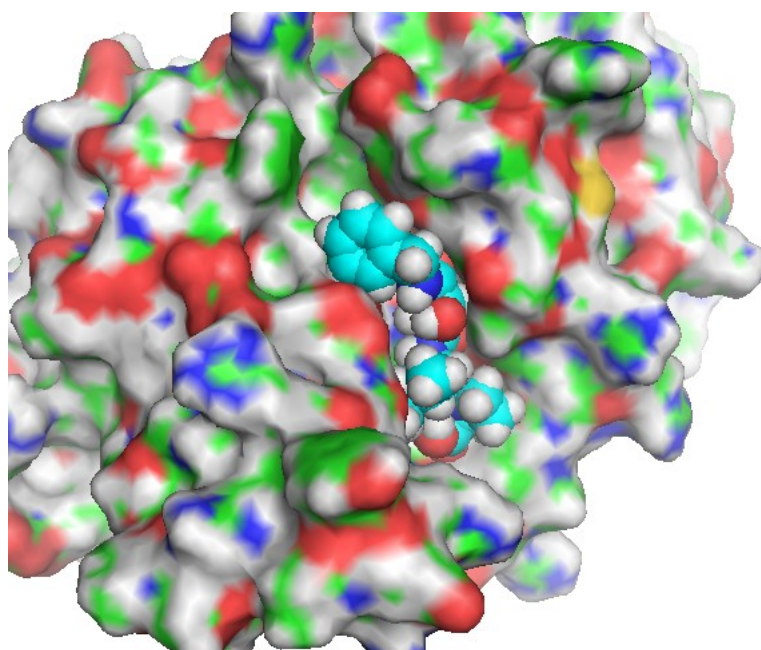

3AI8\_HNQ, Cyscore= -0.0704

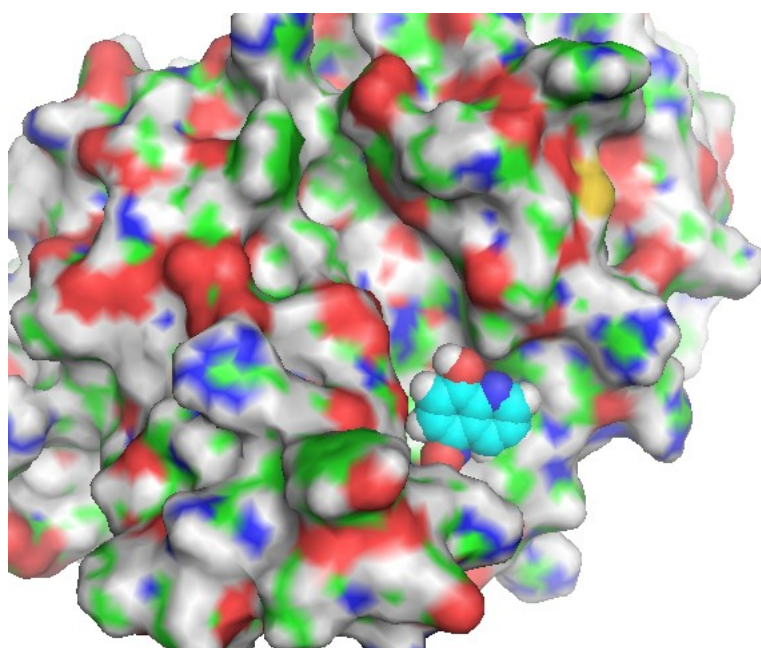

3PDF\_LXV, Cyscore=-1.4434

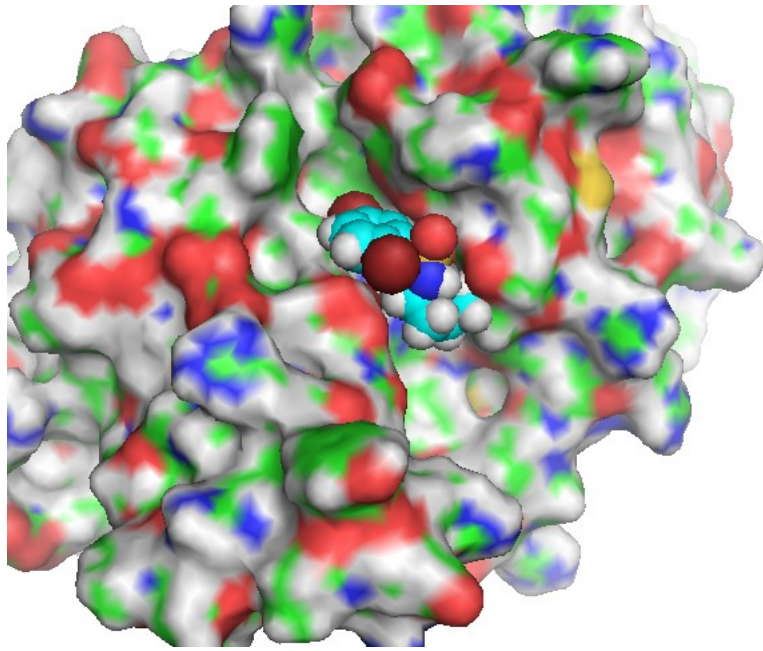

3S3Q\_C1P, Cyscore= -2.4019

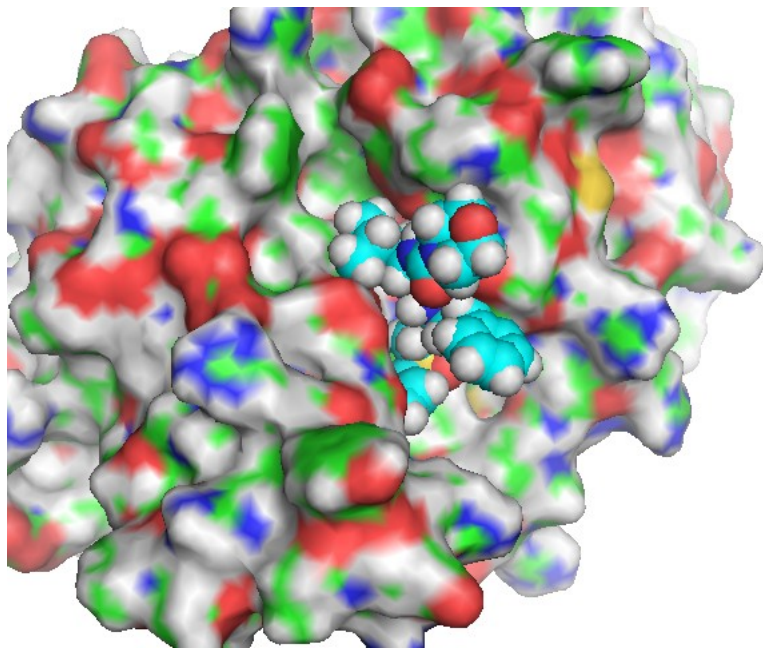

3S3R\_0IW, Cyscore=-1.5028

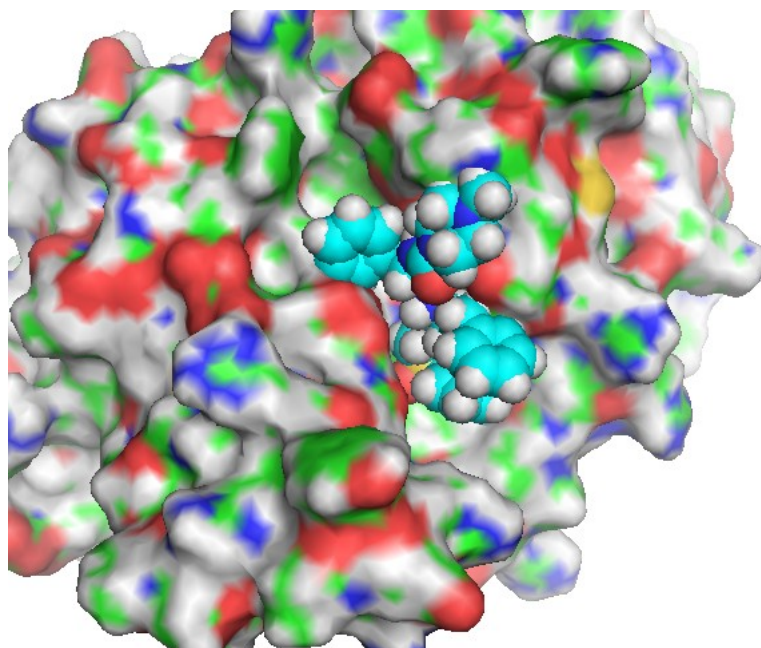



CHEMBL1242746, Cyscore= 1.8177

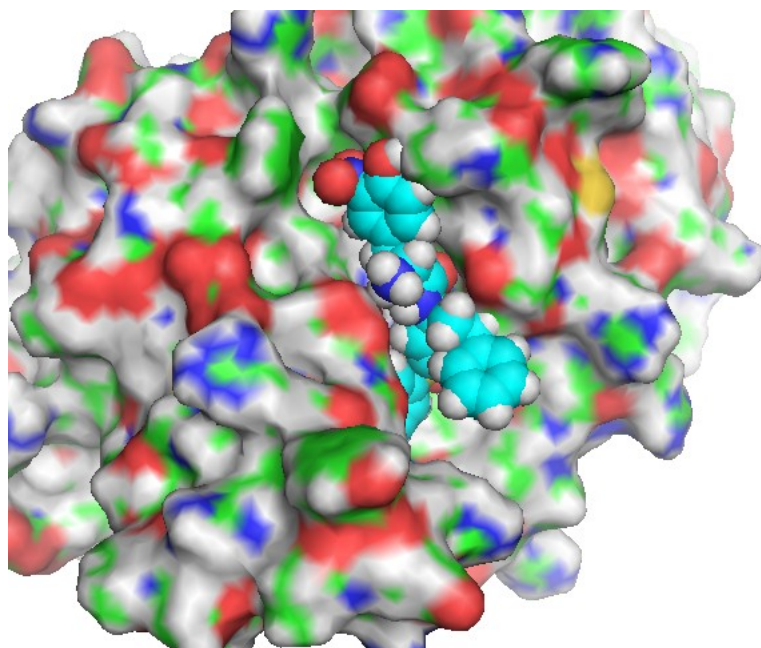

CHEMBL1242747, Cyscore=0.206

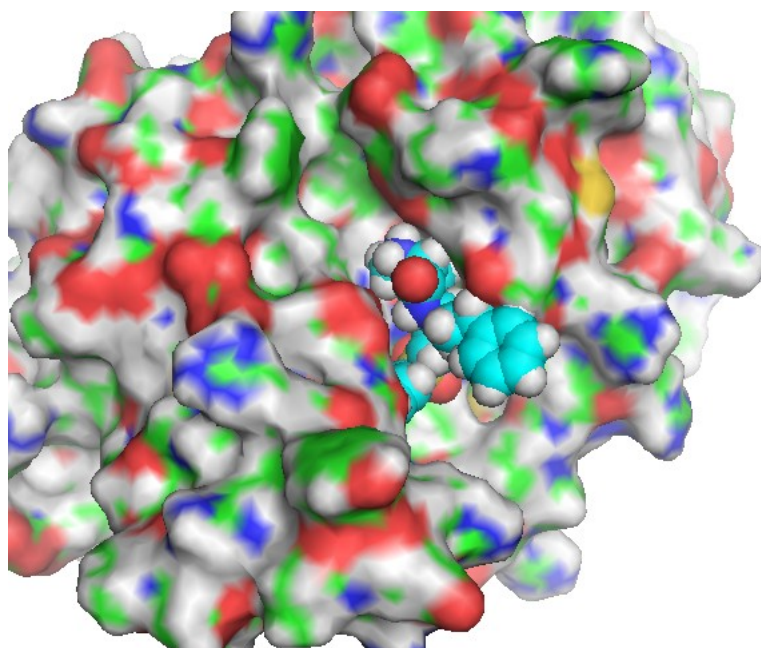

Supplement: 1471-2164-15-S9-S2-S5.pdf [file 1471-2164-15-S9-S2-S5.pdf]
