# Supplementary material for: TINAGL1 and B3GALNT1 are potential therapy target genes to suppress metastasis in non-small cell lung cancer
Source: PubMed Central journal article supplement (PMC4290609; doi:10.1186/1471-2164-15-s9-s2), 2014-12-08

mRNA: NM\_022164

cor= 7.503e-01

P= 2.497e-01

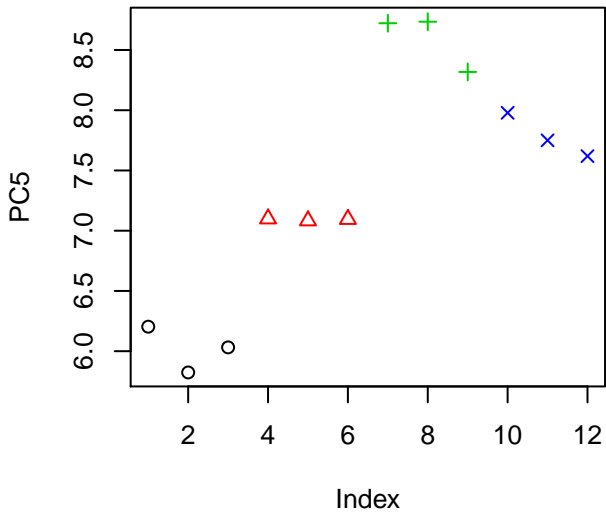

methyl

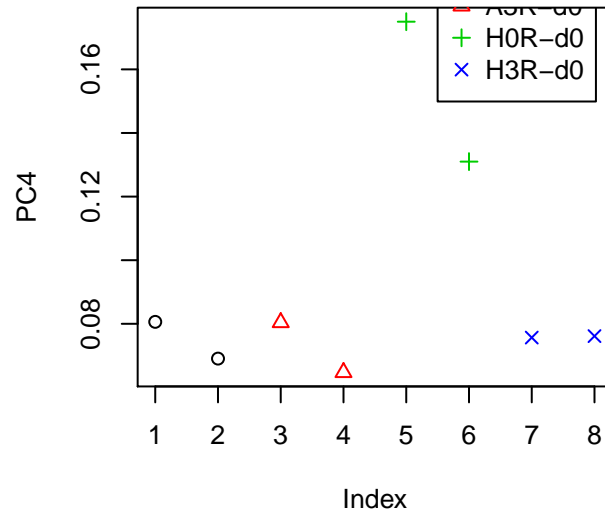

mRNA: NM\_020182

cor= -8.313e-01

P= 1.687e-01

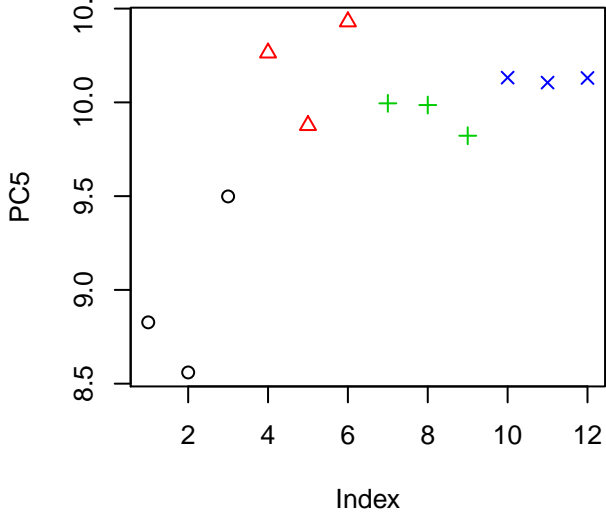

methyl

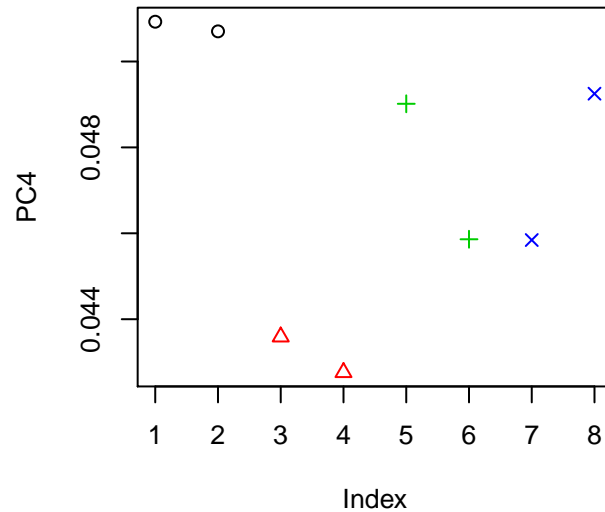

mRNA: NM\_002996

cor=  $-5.678e-01$

P=  $4.322e-01$

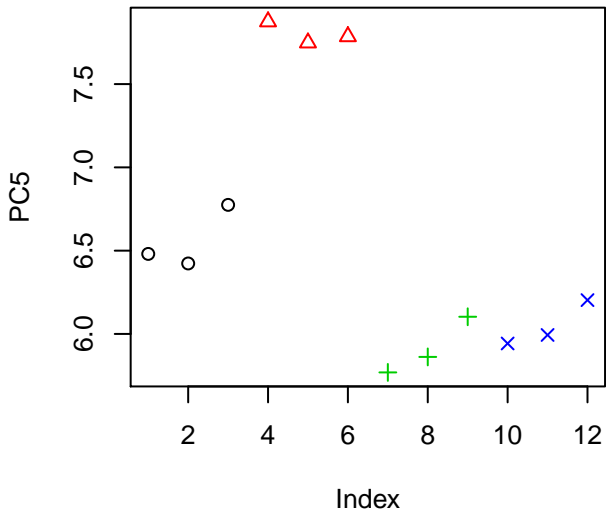

methyl

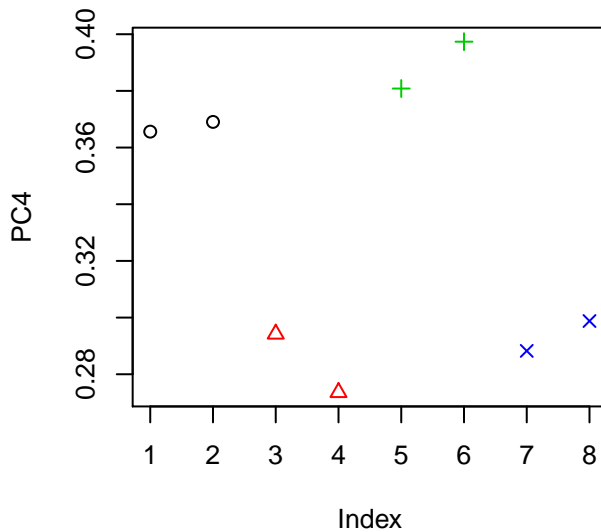

mRNA: NM\_000201

cor=  $2.224e-01$

P=  $7.776e-01$

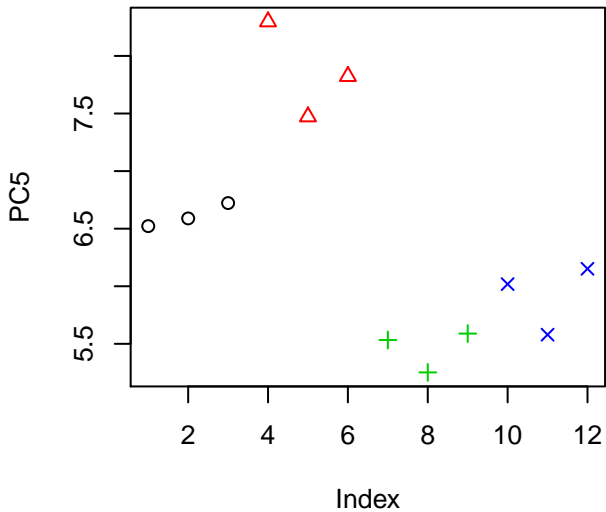

methyl

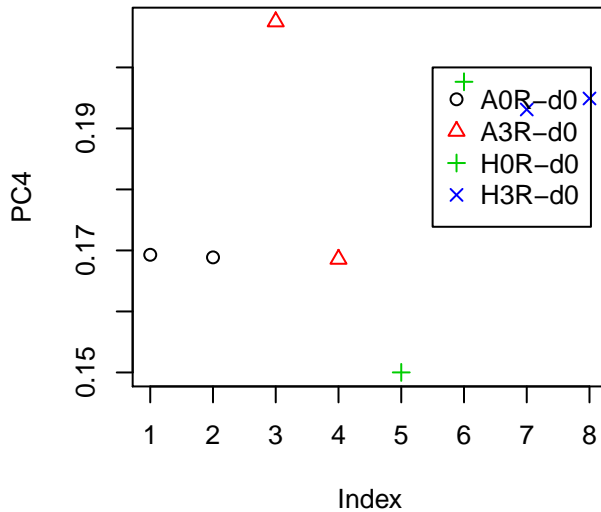

Supplement: 1471-2164-15-S9-S2-S3.pdf [file 1471-2164-15-S9-S2-S3.pdf]
