# Supplementary material for: TINAGL1 and B3GALNT1 are potential therapy target genes to suppress metastasis in non-small cell lung cancer
Source: PubMed Central journal article supplement (PMC4290609; doi:10.1186/1471-2164-15-s9-s2), 2014-12-08
Supplement: 1471-2164-15-S9-S2-S4.pdf [file 1471-2164-15-S9-S2-S4.pdf]

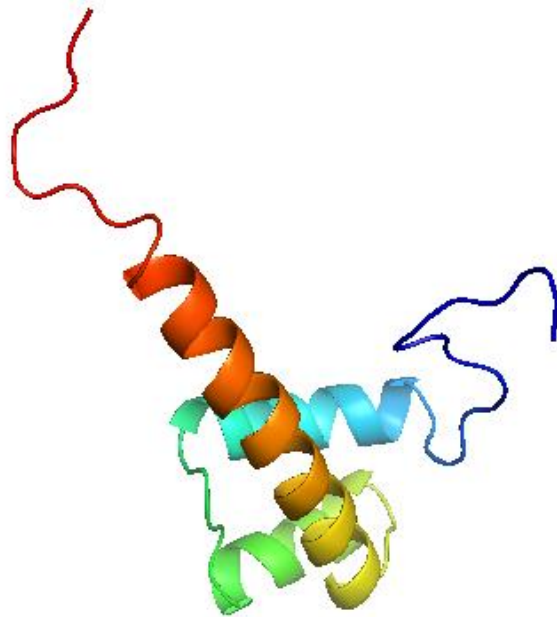

Figure S4 - Tertiary structure of Homeobox domain of *HOXB2* predicted by FAMS using PDB ID: 2CUE\_A as a reference.

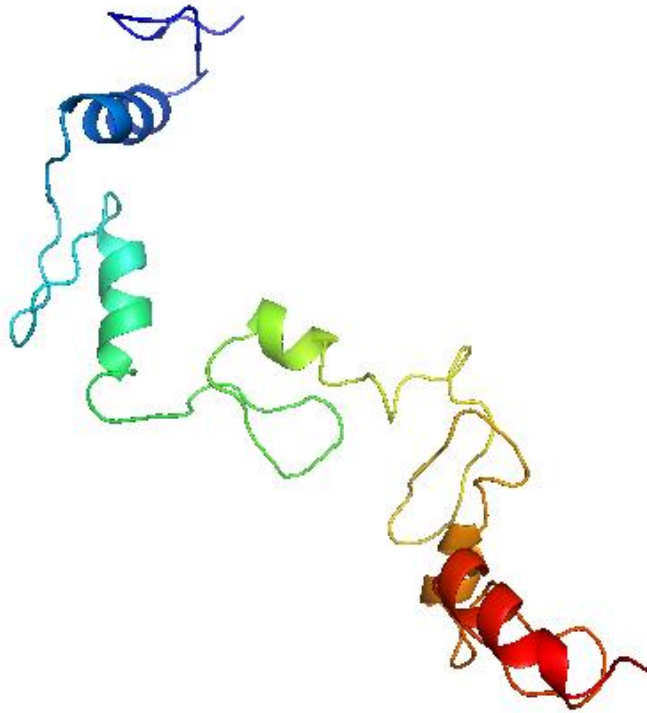

Figure S5 - Tertiary structure of Zinc finger domains of *ZNF114* predicted by FAMS using PDB ID: 1TF6\_A as a reference.

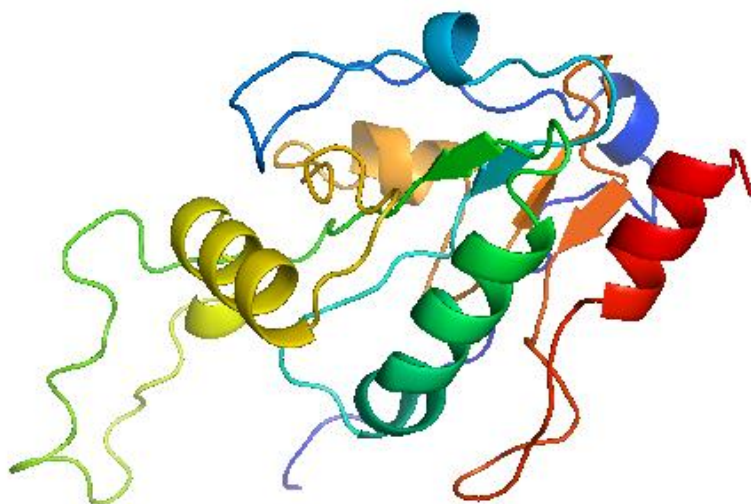

Figure S6 - Tertiary structure of *DIO2* predicted by FAMS using PDB ID: 2YWI\_A as a reference.

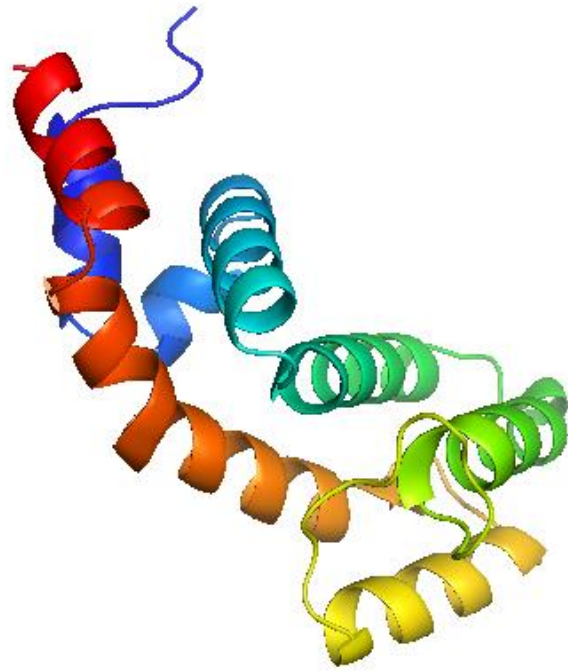

Figure S7 - Tertiary structure of *RGS1* in Protein Data Bank.

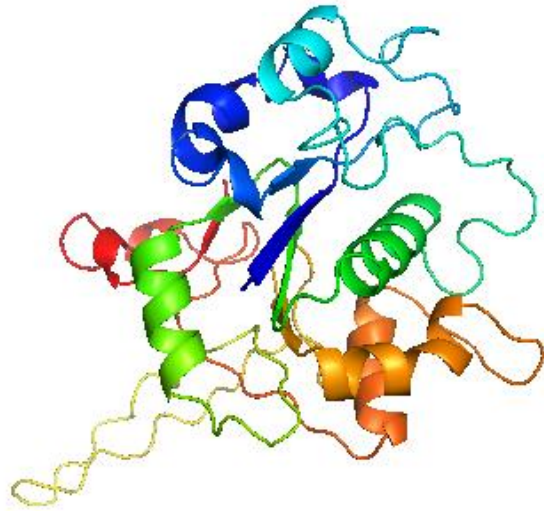

Figure S8 - Tertiary structure of *B3GALNT1* predicted by FAMS using PDB ID:

2J0A\_A as a reference.

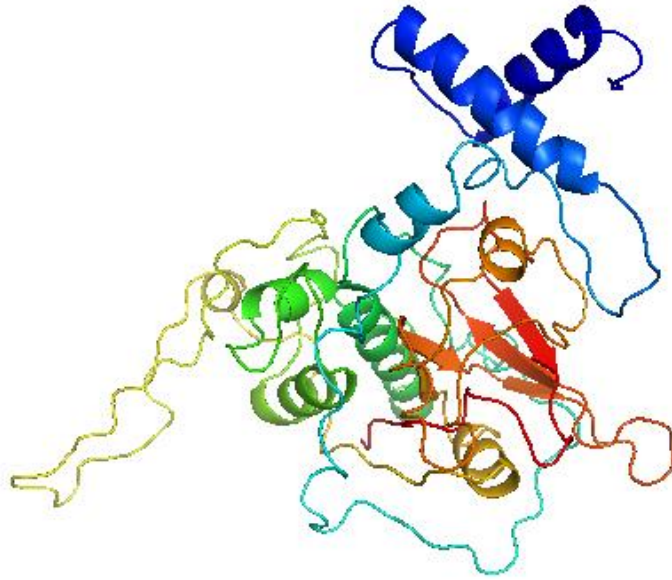

Figure S9 - Tertiary structure of *TIANGLI* predicted by FAMS using PDB ID: 3TNX\_A as a reference.

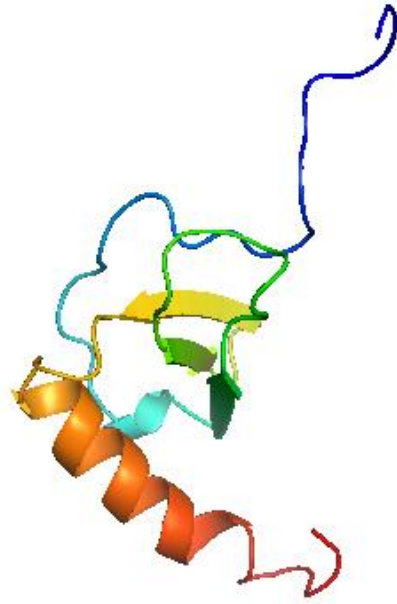

Figure S10 - Tertiary structure of IL-8 domain in *CX3CL1* predicted by FAMS using

PDB ID: 1B2T\_A as a reference.

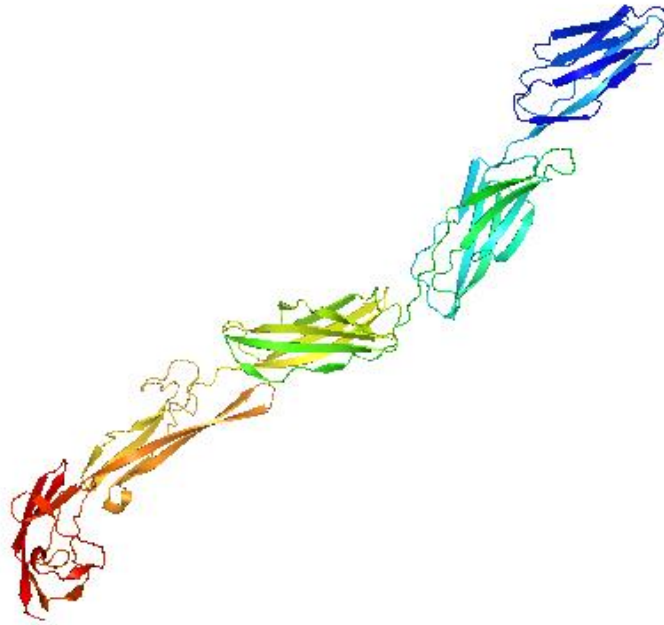

Figure S11 - Tertiary structure of *ICAM1* in Protein Data Bank.



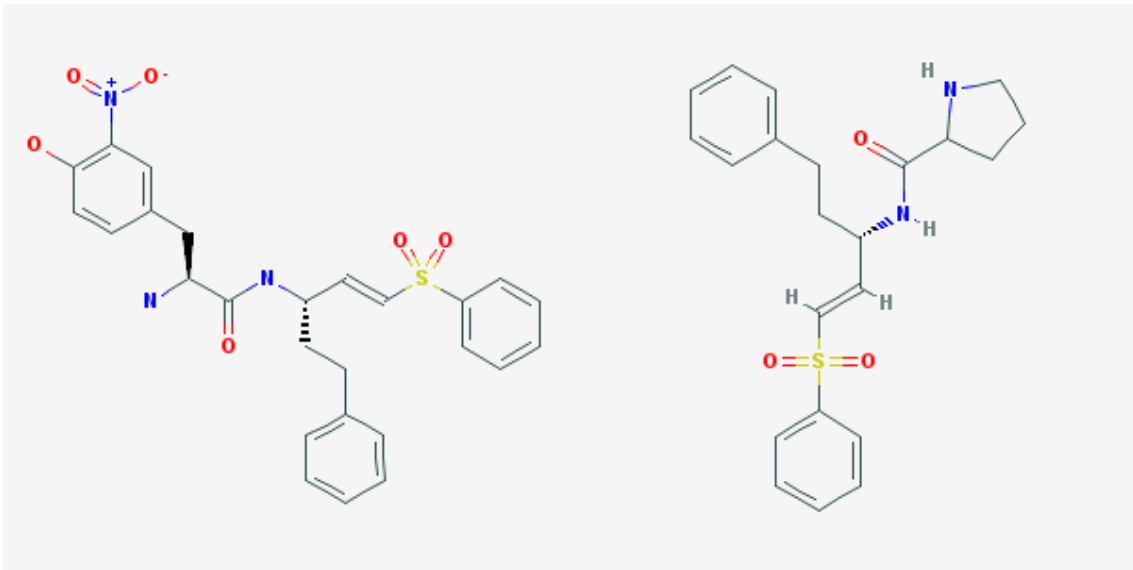

Figure S12 - Drug candidate compounds that bind to *TINAGLI*.

Left: CHEMBL1242746, right: CHEMBL1242747.

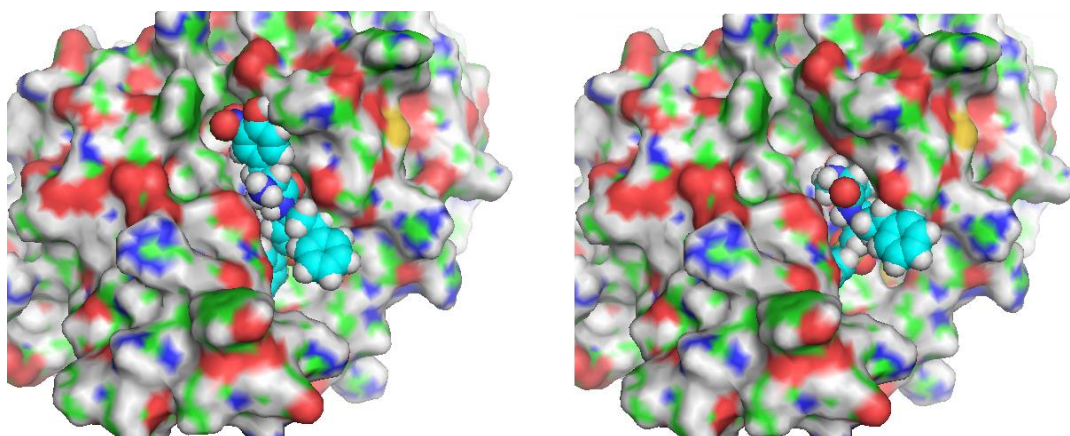

Figure S13 - Ligand candidates binding to cathepsin domain in *TINAGLI* inferred by chooseLD.

Left: CHEMBL1242746, right: CHEMBL1242747. Red: oxygen, blue: nitrogen, white: hydrogen, orange: sulphur, and green (cyan): carbon.

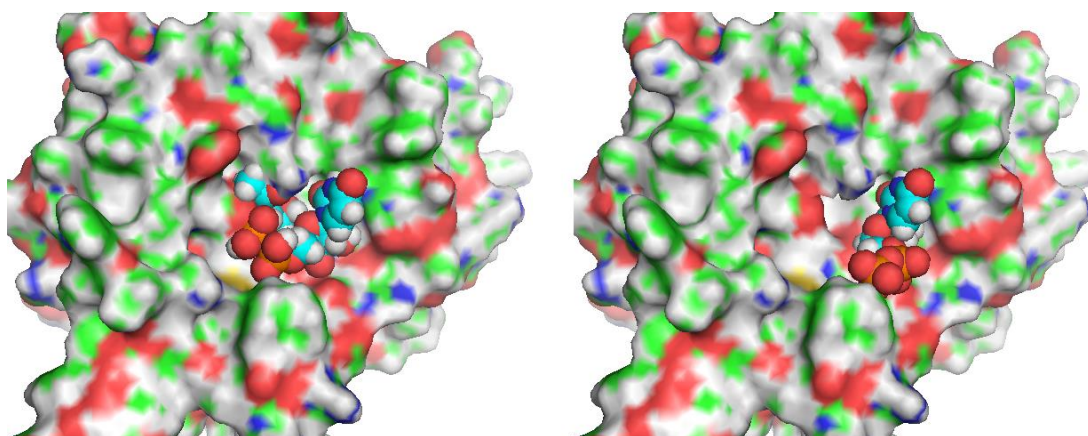

Figure S14 - Ligands that bind to *B3GALNT1* inferred by chooseLD.

Left: UDP-N-acetylglucosamine, Right: UDP. Red: oxygen, blue: nitrogen, white:

hydrogen, orange: sulphur, and green (cyan): carbon.
