# Supplementary material for: TINAGL1 and B3GALNT1 are potential therapy target genes to suppress metastasis in non-small cell lung cancer
Source: PubMed Central journal article supplement (PMC4290609; doi:10.1186/1471-2164-15-s9-s2), 2014-12-08

**methyl NM\_002145**

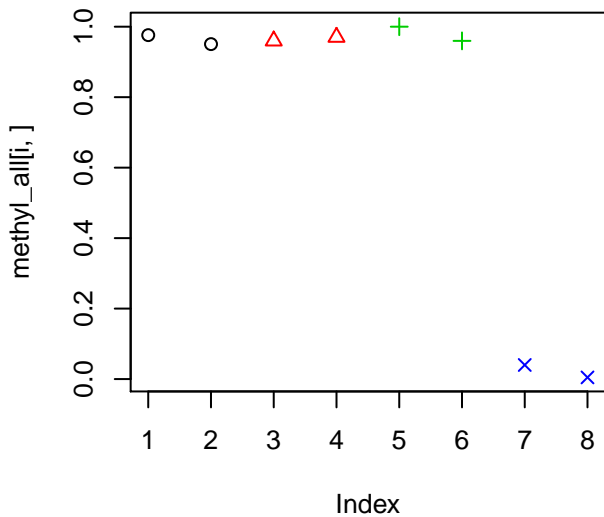

**methyl NM\_032040**

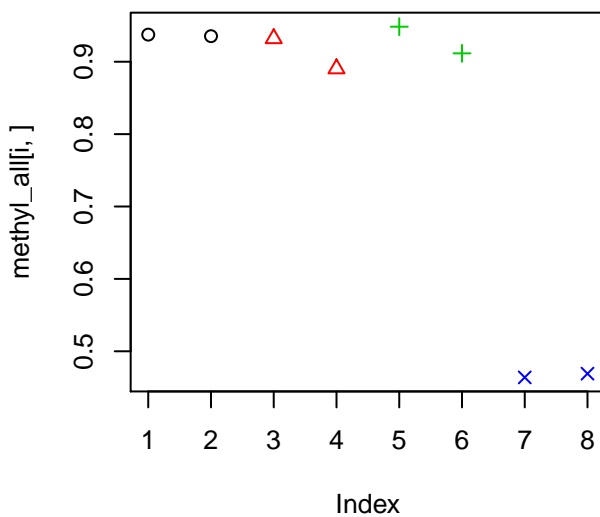

**methyl NM\_153608**

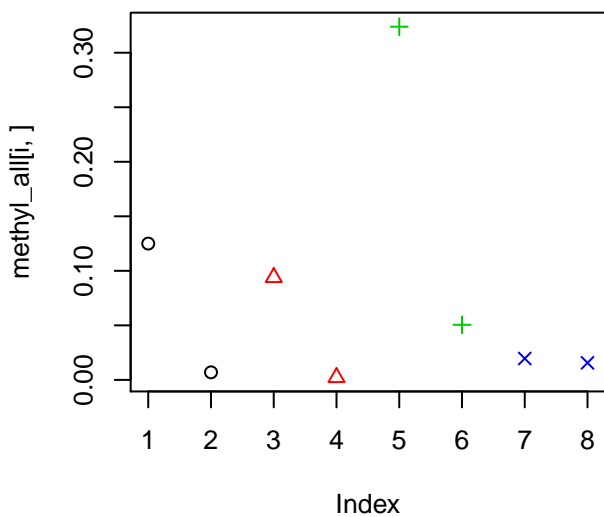

**methyl NM\_006762**

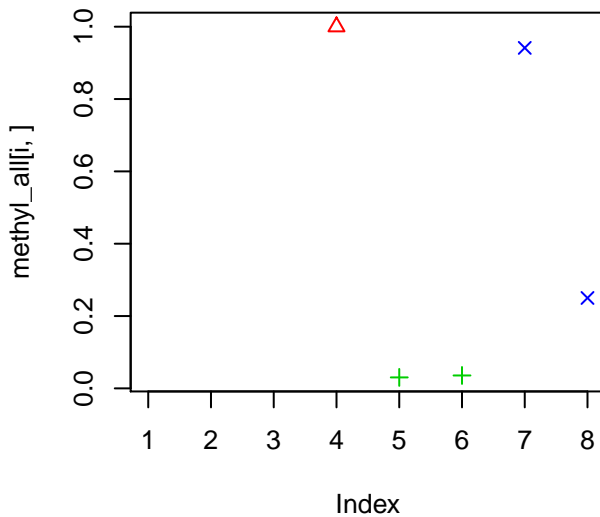

**methyl NM\_003781**

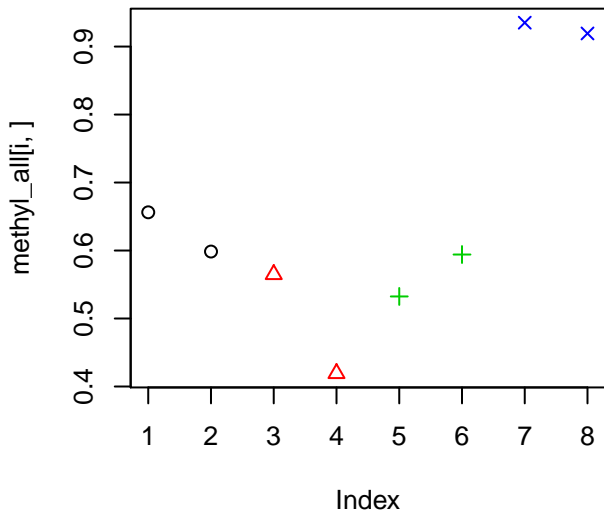

**methyl NM\_022164**

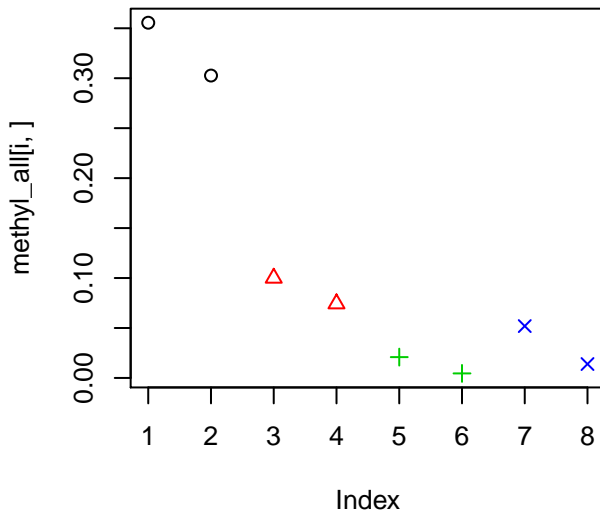

**methyl NM\_020182**

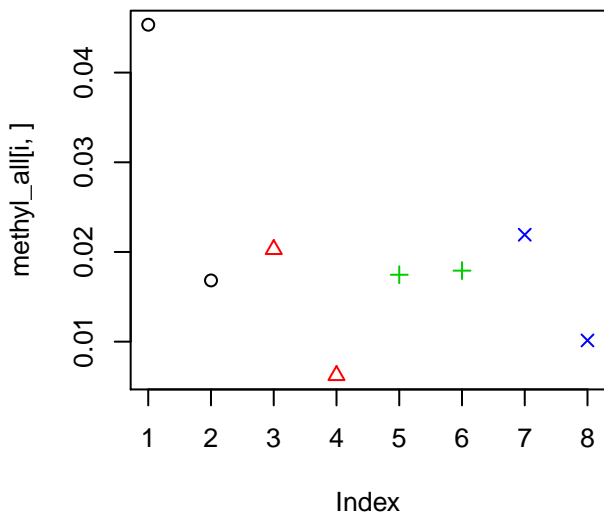

**methyl NM\_002996**

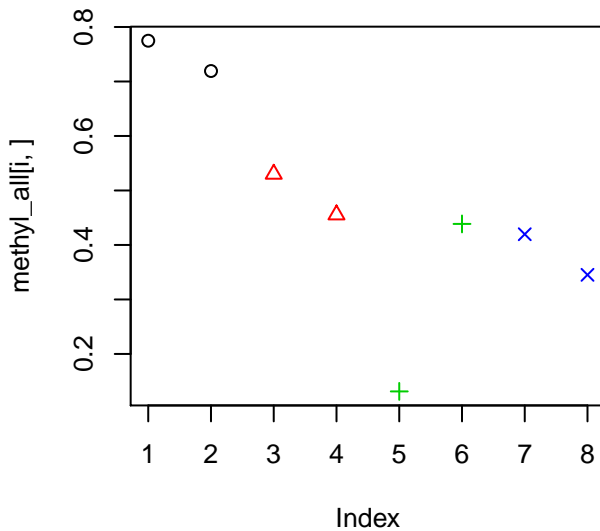

**methyl NM\_000201**

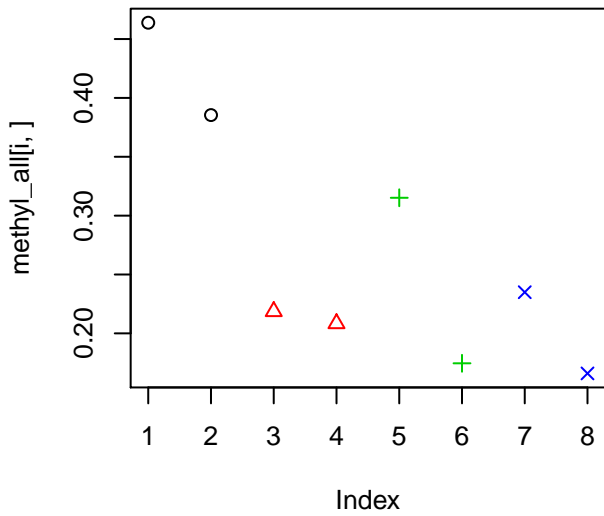

Supplement: 1471-2164-15-S9-S2-S6.pdf [file 1471-2164-15-S9-S2-S6.pdf]
